# Supplementary material
Source: PubMed Central journal article supplement (PMC5098501)
Supplement: NIHMS791061-supplement-Supplemental.pdf [file NIHMS791061-supplement-Supplemental.pdf]

# A Generalized Framework for Learning Linear Dynamical Systems from Multivariate Time Series - Supplemental Material

Zitao Liu\*

Milos Hauskrecht\*

## Notations

We use the following notations in this supplemental material. The notation is consistent with the original paper.

- $\hat{\mathbf{z}}_{t|t-1} = \mathbb{E}[\mathbf{z}_t | \{\mathbf{y}\}_1^{t-1}]$  is the *priori* estimation
- $\hat{\mathbf{z}}_{t-1|t-1} = \mathbb{E}[\mathbf{z}_{t-1} | \{\mathbf{y}\}_1^{t-1}]$  is the *posteriori* estimation.
- $P_{t|t-1} = \mathbb{E}[(\mathbf{z}_t - \hat{\mathbf{z}}_{t|t-1})(\mathbf{z}_t - \hat{\mathbf{z}}_{t|t-1})']$  is the *priori* estimate error covariance.
- $P_{t-1|t-1} = \mathbb{E}[(\mathbf{z}_{t-1} - \hat{\mathbf{z}}_{t-1|t-1})(\mathbf{z}_{t-1} - \hat{\mathbf{z}}_{t-1|t-1})']$  is the *posteriori* estimate error covariance.
- $\hat{\mathbf{z}}_{t|T} \equiv \mathbb{E}[\mathbf{z}_t | \mathbf{y}]$ ,  $M_{t|T} \equiv \mathbb{E}[\mathbf{z}_t \mathbf{z}'_t | \mathbf{y}]$ ,  $M_{t,t-1|T} \equiv \mathbb{E}[\mathbf{z}_t \mathbf{z}'_{t-1} | \mathbf{y}]$ ,  $P_{t|T} = \text{VAR}[\mathbf{z}_t | \mathbf{y}]$ , and  $P_{t,t-1|T} = \text{VAR}[\mathbf{z}_t \mathbf{z}'_{t-1} | \mathbf{y}]$

## 1 Kalman Filter Algorithm

The details of Kalman filter algorithm are shown in Algorithm 1.

---

### Algorithm 1 Kalman filter algorithm for LDS

---

INPUT: Current step LDS parameters:  $\Omega = \{A, C, Q, R, \xi, \Psi\}$ .

PROCEDURE:

- 1: // Initialize the recursion
- 2:  $\hat{\mathbf{z}}_{1|1} = \xi$  and  $P_{1|1} = \Psi$ .
- 3: // Start the recursion
- 4: **for**  $t = 2 \rightarrow T$  **do**
- 5: // Time Update:
- 6:  $\hat{\mathbf{z}}_{t|t-1} = A\hat{\mathbf{z}}_{t-1|t-1}$
- 7:  $P_{t|t-1} = AP_{t-1|t-1}A' + Q$
- 8: // Measure Update:
- 9:  $K_t = P_{t|t-1}C'(CP_{t|t-1}C' + R)^{-1}$
- 10:  $\hat{\mathbf{z}}_{t|t} = \hat{\mathbf{z}}_{t|t-1} + K_t(\mathbf{y}_t - C\hat{\mathbf{z}}_{t|t-1})$
- 11:  $P_{t|t} = P_{t|t-1} - K_tCP_{t|t-1}$
- 12: **end for**

OUTPUT:  $\{\hat{\mathbf{z}}_{t|t-1}\}_{t=2}^T$ ,  $\{\hat{\mathbf{z}}_{t|t}\}_{t=1}^T$ ,  $\{P_{t|t}\}_{t=1}^T$ ,  $\{P_{t|t-1}\}_{t=2}^T$  and  $\{K_t\}_{t=1}^T$ .

---

## 2 Kalman Smoothing Algorithm

The details of Kalman smoothing algorithm are shown in Algorithm 2.

---

### Algorithm 2 EM: E-step Smoothing algorithm for LDS

---

INPUT:

- Output from Kalman filter algorithm:  $\{\hat{\mathbf{z}}_{t|t-1}\}_{t=2}^T$ ,  $\{\hat{\mathbf{z}}_{t|t}\}_{t=1}^T$ ,  $\{P_{t|t}\}_{t=1}^T$ ,  $\{P_{t|t-1}\}_{t=2}^T$  and  $\{K_t\}_{t=1}^T$ .
- Current step LDS parameters:  $\Omega = \{A, C, Q, R, \xi, \Psi\}$ .

PROCEDURE:

- 1: // Initialize the recursion
- 2:  $M_{T|T} = P_{T|T} + \hat{\mathbf{z}}_{T|T}\hat{\mathbf{z}}'_{T|T}$
- 3:  $J_{T-1} = P_{T-1|T-1}A'(P_{T|T-1})^{-1}$
- 4:  $P_{T-1|T} = P_{T-1|T-1} + J_{T-1}(P_{T|T} - P_{T|T-1})J'_{T-1}$
- 5:  $\hat{\mathbf{z}}_{T-1|T} = \hat{\mathbf{z}}_{T-1|T-1} + J_{T-1}(\hat{\mathbf{z}}_{T|T} - A\hat{\mathbf{z}}_{T-1|T-1})$
- 6:  $P_{T,T-1|T} = (I - K_T C)AP_{T-1|T-1}$
- 7:  $M_{T,T-1|T} = P_{T,T-1|T} + \hat{\mathbf{z}}_{T|T}\hat{\mathbf{z}}'_{T-1|T}$
- 8: // Start the recursion
- 9: **for**  $t = T-1 \rightarrow 1$  **do**
- 10:  $M_{t|T} = P_{t|T} + \hat{\mathbf{z}}_{t|T}\hat{\mathbf{z}}'_{t|T}$
- 11:  $J_{t-1} = P_{t-1|t-1}A'(P_{t|t-1})^{-1}$
- 12:  $P_{t,t-1|T} = P_{t|t}J'_{t-1} + J_t(P_{t+1,t|T} - AP_{t|t})J'_{t-1}$
- 13:  $M_{t,t-1|T} = P_{t,t-1|T} + \hat{\mathbf{z}}_{t|T}\hat{\mathbf{z}}'_{t-1|T}$
- 14:  $\hat{\mathbf{z}}_{t-1|T} = \hat{\mathbf{z}}_{t-1|t-1} + J_{t-1}(\hat{\mathbf{z}}_{t|T} - A\hat{\mathbf{z}}_{t-1|t-1})$
- 15:  $P_{t-1|T} = P_{t-1|t-1} + J_{t-1}(P_{t|T} - P_{t|t-1})J'_{t-1}$
- 16: **end for**

OUTPUT:  $\{\hat{\mathbf{z}}_{t-1|T}\}_{t=1}^T$ ,  $\{M_{t|T}\}_{t=1}^T$  and  $\{M_{t,t-1|T}\}_{t=1}^T$ .

---

## 3 Theorem Proof

### 3.1 Theorem 3.1 Proof

**THEOREM 3.1.** *Generalized gradient descent with a fixed step size  $\rho \leq 1/2(\|\mathbf{Z}_- \mathbf{Z}_-^T\|_F + \gamma/\lambda)$  for minimizing eq.(3.22) has convergence rate  $O(1/k)$ , where  $k$  is the number of iterations.*

*Proof.*  $g(A)$  is differentiable with respect to  $A$ , and its gradient is

$$\nabla g(A) = 2(A\mathbf{Z}_- \mathbf{Z}_-^T - \mathbf{Z}_+ \mathbf{Z}_-^T + \gamma/\lambda A)$$

Using simple algebraic manipulation we arrive at

---

\*Computer Science Department, University of Pittsburgh, Pittsburgh, PA USA. Email: {ztliau, milos}@cs.pitt.edu

$$\begin{aligned}
& \|\nabla g(X) - \nabla g(Y)\|_F \\
&= 2\|(X - Y)(\mathbf{Z}_- \mathbf{Z}_-^\top) + \gamma/\lambda(X - Y)\|_F \\
&\leq 2\|\mathbf{Z}_- \mathbf{Z}_-^\top\|_F \cdot \|X - Y\|_F + 2\gamma/\lambda \cdot \|X - Y\|_F \\
&= 2(\|\mathbf{Z}_- \mathbf{Z}_-^\top\|_F + \gamma/\lambda) \cdot \|X - Y\|_F
\end{aligned}$$

The inequality holds because of the sub-multiplicative property of Frobenius norm. Since we know for eq.(3.22),  $\min_A g(A) + \gamma_A \|A\|_*$ , and  $g(A)$  has Lipschitz continuous gradient with constant  $2(\|\mathbf{Z}_- \mathbf{Z}_-^\top\|_F + \gamma/\lambda)$ , according to [1, 2] we have

$$\begin{aligned}
& \left\| g(A^{(k)}) + \gamma_A \|A^{(k)}\|_* - g(A^*) - \gamma_A \|A^*\|_* \right\| \\
&\leq \left\| A^{(0)} - A^* \right\|_F^2 / 2tk
\end{aligned}$$

where  $A^{(0)}$  is the initial value and  $A^*$  is the optimal value for  $A$ ;  $k$  is the number of iterations. ■

### 3.2 Theorem 3.2 Proof

**THEOREM 3.2.** *Minimizing  $A$  from eq.(3.7) with  $\mathcal{R}_A(A) = \emptyset$  is equivalent to minimizing the following problem:*

$$(3.1) \quad \min_a a^\top B a - 2q^\top a$$

where  $a = \text{vec}(A^\top)$ ,  $B = I_d \otimes (\mathbf{Z}_- \mathbf{Z}_-^\top)$ ,  $q = (I_d \otimes \mathbf{Z}_- \mathbf{Z}_+^\top) \text{vec}(I_d)$ .

*Proof.* We will use the following equation to show the equivalence.

$$\text{tr}(A_{k \times l} B_{l \times m} C_{m \times n}) = \text{vec}(A^\top)^\top (I_k \otimes B) \text{vec}(C)$$

$$\begin{aligned}
& \min_A \|\mathbf{Z}_+ - A\mathbf{Z}_-\|_F^2 \\
&\Leftrightarrow \min_A \text{Tr}[(\mathbf{Z}_+^\top - \mathbf{Z}_-^\top A^\top)(\mathbf{Z}_+ - A\mathbf{Z}_-)] \\
&\Leftrightarrow \min_A \text{Tr}[A\mathbf{Z}_- \mathbf{Z}_-^\top A^\top - 2I_d \mathbf{Z}_+ \mathbf{Z}_-^\top A^\top] \\
&\Leftrightarrow \min_A \text{vec}(A^\top)^\top (I_d \otimes \mathbf{Z}_- \mathbf{Z}_-^\top) \text{vec}(A^\top) \\
&\quad - 2 \text{vec}(I_d)^\top (I_d \otimes \mathbf{Z}_+ \mathbf{Z}_-^\top) \text{vec}(A^\top) \\
&\Leftrightarrow \min_a a^\top (I_d \otimes \mathbf{Z}_- \mathbf{Z}_-^\top) a - 2 \text{vec}(I_d)^\top (I_d \otimes \mathbf{Z}_+ \mathbf{Z}_-^\top) a \\
&\Leftrightarrow \min_a a^\top (I_d \otimes \mathbf{Z}_- \mathbf{Z}_-^\top) a - 2 \left( (I_d \otimes \mathbf{Z}_+ \mathbf{Z}_-^\top) \text{vec}(I_d) \right)^\top a \\
&\Leftrightarrow \min_a a^\top B a - 2q^\top a
\end{aligned}$$

where  $a = \text{vec}(A^\top)$ ,  $B = I_d \otimes \mathbf{Z}_- \mathbf{Z}_-^\top$  and  $q = (I_d \otimes \mathbf{Z}_- \mathbf{Z}_+^\top) \text{vec}(I_d)$ . ■

## 4 Qualitative Prediction Analysis

In this section, we qualitatively show the prediction effectiveness of the gLDS-smooth model from our framework. Figure 1 and Figure 2 show the predictions results for the flour price series in Minneapolis and Kansas City.

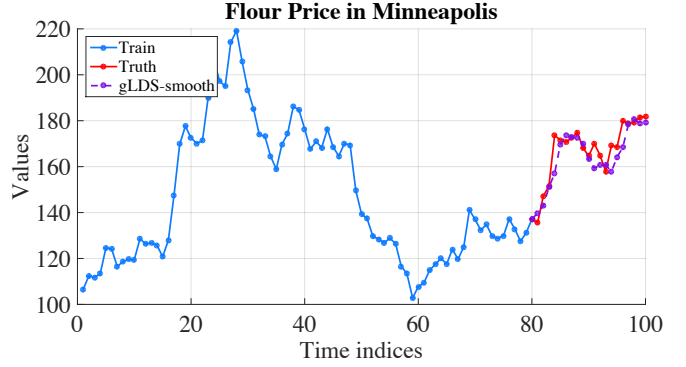

Figure 1: Predictions for flour price series in Minneapolis.

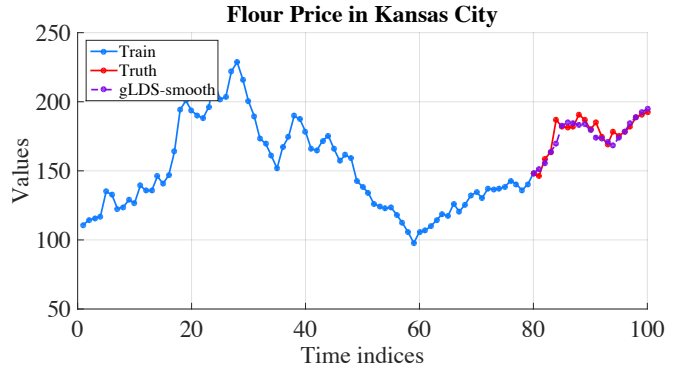

Figure 2: Predictions for flour price series in Kansas City.

**4.1 Quantitative Prediction Analysis** In this section, we quantitatively compute and compare the prediction accuracy of the proposed methods (gLDS-ridge and gLDS-smooth) with the standard LDS learning approaches: EM and spectral algorithms. The results are shown in Table 1 and Table 2.

## 5 Stability Effects of gLDS-stable

In this section, we show the stability effects of the gLDS-stable model learned using our framework by generating the simulated sequences in the future for *flourprice*, *h20\_evap* and *clinical* datasets, which are shown in Figures 3 - 5.

Table 1: Average-MAPE results on *flourprice* dataset.

| # of states | Training: 80% |             | Training: 90% |             |
|-------------|---------------|-------------|---------------|-------------|
|             | 5             | 10          | 5             | 10          |
| Spectral    | 6.25          | 5.86        | 6.61          | 5.93        |
| EM          | 3.62          | 4.15        | 3.63          | 3.94        |
| gLDS-ridge  | 3.37          | 3.14        | 3.29          | 2.82        |
| gLDS-smooth | <b>3.24</b>   | <b>2.71</b> | <b>2.86</b>   | <b>2.50</b> |

Table 2: Average-MAPE results on *h2o\_evap* dataset.

| # of states | Training: 80% |              | Training: 90% |              |
|-------------|---------------|--------------|---------------|--------------|
|             | 5             | 10           | 5             | 10           |
| Spectral    | 36.26         | 32.20        | 13.73         | 15.88        |
| EM          | 39.53         | 68.68        | 17.33         | 17.46        |
| gLDS-ridge  | 27.97         | 28.53        | 16.12         | 14.42        |
| gLDS-smooth | <b>26.38</b>  | <b>26.46</b> | <b>14.01</b>  | <b>14.08</b> |

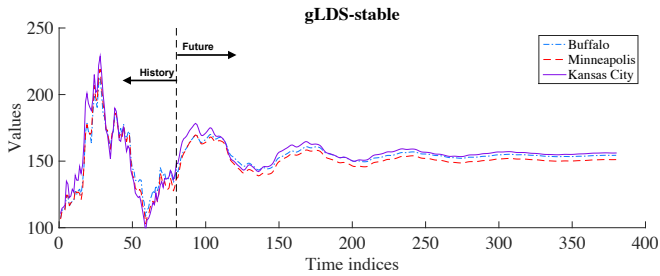

Figure 3: Training data and simulated sequences from gLDS-stable model in *flourprice* data.

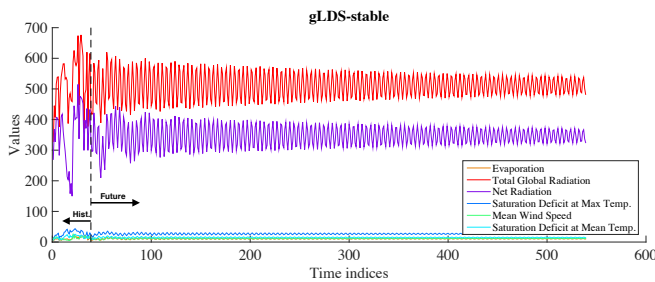

Figure 4: Training data and simulated sequences from gLDS-stable model in *h2o\_evap* data.

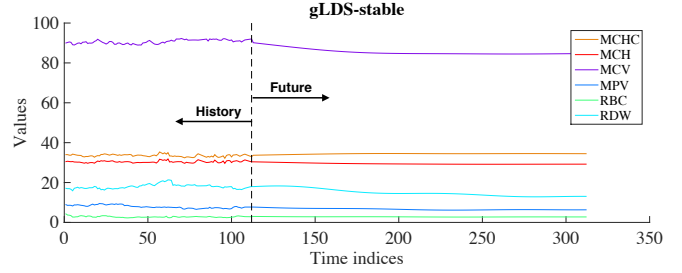

Figure 5: Training data and simulated sequences from gLDS-stable model in *clinical* data for one patient.

## 6 Sparsification Effects of gLDS-low-rank

In this section, we show the sparsification effects of the gLDS-low-rank model learned using our framework. The gLDS-low-rank model is able to identify the intrinsic dimensionality of the hidden state space. The results are shown in Figure 6 and Figure 7.

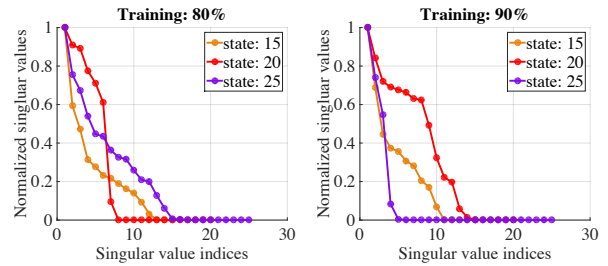

Figure 6: Intrinsic dimensionality recovery of the hidden state space in *flourprice* dataset.

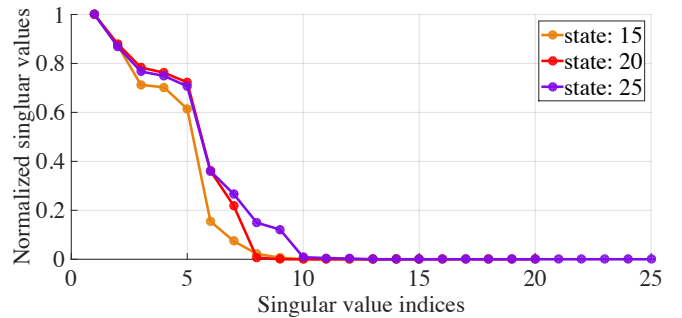

Figure 7: Intrinsic dimensionality recovery of the hidden state space in *clinical* dataset.

## References

- [1] M. FORNASIER AND H. RAUHUT, *Iterative thresholding algorithms*, Applied and Computational Harmonic Analysis, 25 (2008), pp. 187–208.
- [2] N. Z. SHOR, *The rate of convergence of the generalized gradient descent method*, Cybernetics and Systems Analysis, 4 (1968), pp. 79–80.
